# Supplementary material for: Effect of Pregnenolone vs Placebo on Self-reported Chronic Low Back Pain Among US Military Veterans: A Randomized Clinical Trial
Source: PubMed Central journal article supplement (PMC7052727; doi:10.1001/jamanetworkopen.2020.0287), 2020-03-02
Supplement: jamanetwopen-3-e200287-s002.pdf [file jamanetwopen-3-e200287-s002.pdf]

## Supplementary Online Content

Naylor JC, Kilts JD, Shampine LJ, et al. Effect of pregnenolone vs placebo on self-reported chronic low back pain among US military veterans: a randomized clinical trial. *JAMA Netw Open*. 2020;3(3):e200287. doi:10.1001/jamanetworkopen.2020.0287

**eTable 1.** Adverse Events as Reported on Hillside Adverse Event Scale

**eTable 2.** Odds Ratios for 20% Improvement of Pain Based on Treatment with Pregnenolone vs Placebo

**eTable 3.** Secondary Outcomes

**eTable 4.** Neurosteroid Level Changes by Treatment Group

This supplementary material has been provided by the authors to give readers additional information about their work.

eTable 1. Adverse Events as Reported on Hillside Adverse Event Scale

|                           | Placebo                                         |                                  | Pregnenolone                                    |                                  |
|---------------------------|-------------------------------------------------|----------------------------------|-------------------------------------------------|----------------------------------|
|                           | Total Number of Participants Reporting Symptoms | Total Times Reported on Hillside | Total Number of Participants Reporting Symptoms | Total Times Reported on Hillside |
| <b>Symptom</b>            |                                                 |                                  |                                                 |                                  |
| Delirium/Confusion        | 0                                               | 0                                | 2                                               | 3                                |
| Disorientation            | 1                                               | 1                                | 2                                               | 2                                |
| Excitement/Agitation      | 0                                               | 0                                | 5                                               | 5                                |
| Restlessness              | 1                                               | 2                                | 2                                               | 2                                |
| Increased motor activity  | 1                                               | 1                                | 2                                               | 2                                |
| Decreased motor activity  | 2                                               | 2                                | 0                                               | 0                                |
| Malaise                   | 0                                               | 0                                | 2                                               | 3                                |
| Insomnia                  | 8                                               | 11                               | 6                                               | 8                                |
| Hypersomnia               | 2                                               | 2                                | 1                                               | 1                                |
| Drowsiness                | 7                                               | 7                                | 8                                               | 9                                |
| Myoclonus                 | 1                                               | 1                                | 2                                               | 2                                |
| Cramps                    | 2                                               | 2                                | 5                                               | 5                                |
| Tremor                    | 1                                               | 2                                | 2                                               | 2                                |
| Paresthesia               | 1                                               | 1                                | 4                                               | 4                                |
| Dyskinesia                | 0                                               | 0                                | 2                                               | 2                                |
| Tinnitus                  | 5                                               | 5                                | 6                                               | 6                                |
| Vertigo                   | 1                                               | 1                                | 2                                               | 3                                |
| Hypertension              | 1                                               | 1                                | 2                                               | 2                                |
| Syncope/Dizziness         | 2                                               | 4                                | 2                                               | 2                                |
| Palpitations              | 1                                               | 1                                | 1                                               | 1                                |
| Tachycardia               | 0                                               | 0                                | 1                                               | 1                                |
| Peripheral edema          | 0                                               | 0                                | 1                                               | 1                                |
| Cold extremities          | 1                                               | 1                                | 1                                               | 1                                |
| Dry mouth                 | 8                                               | 8                                | 5                                               | 7                                |
| Nasal congestion          | 2                                               | 2                                | 4                                               | 4                                |
| Blurred vision            | 1                                               | 1                                | 1                                               | 1                                |
| Constipation              | 2                                               | 2                                | 3                                               | 4                                |
| Increased salivation      | 2                                               | 2                                | 0                                               | 0                                |
| Fever                     | 1                                               | 1                                | 1                                               | 1                                |
| Sweating                  | 0                                               | 0                                | 1                                               | 1                                |
| Nausea                    | 4                                               | 4                                | 7                                               | 8                                |
| Vomiting                  | 2                                               | 2                                | 2                                               | 2                                |
| Diarrhea                  | 3                                               | 3                                | 6                                               | 8                                |
| Urinary retention         | 2                                               | 2                                | 0                                               | 0                                |
| Nocturnal/Enuresis        | 0                                               | 0                                | 1                                               | 1                                |
| Menstrual disturbance     | 1                                               | 1                                | 2                                               | 2                                |
| Decreased interest in sex | 1                                               | 2                                | 2                                               | 2                                |
| Impaired sex performance  | 0                                               | 0                                | 2                                               | 4                                |
| Dermatological            | 5                                               | 6                                | 3                                               | 2                                |
| Joint pain/stiffness      | 4                                               | 7                                | 4                                               | 5                                |
| Muscle pain/stiffness     | 7                                               | 9                                | 7                                               | 7                                |
| Decreased appetite        | 4                                               | 5                                | 7                                               | 8                                |

eTable 2. Odds Ratios for 20% Improvement of Pain based on Treatment with Pregnenolone vs Placebo

|                     | Pain Diary 20% |               |                |                     | Pain Recall 20% |               |                |
|---------------------|----------------|---------------|----------------|---------------------|-----------------|---------------|----------------|
|                     | No             | Yes           | Total          |                     | No              | Yes           | Total          |
| <b>Placebo</b>      | 30             | 12            | 42             | <b>Placebo</b>      | 31              | 11            | 42             |
|                     | 71.4%          | 28.6%         |                |                     | 73.8%           | 26.2%         |                |
| <b>Pregnenolone</b> | 20             | 21            | 41             | <b>Pregnenolone</b> | 21              | 20            | 41             |
|                     | 48.8%          | 51.2%         |                |                     | 51.2%           | 48.8%         |                |
| <b>Total</b>        | 50             | 33            | 83             | <b>Total</b>        | 52              | 31            | 83             |
|                     |                |               |                |                     |                 |               |                |
| <b>OR</b>           | <b>-95%CI</b>  | <b>+95%CI</b> | <b>p-Value</b> | <b>OR</b>           | <b>-95%CI</b>   | <b>+95%CI</b> | <b>p-Value</b> |
| 2.62                | 1.06           | 6.50          | <b>0.04</b>    | 2.68                | 1.07            | 6.74          | <b>0.04</b>    |

eTable 3 Secondary Outcomes

| Secondary Outcome at Visit 6                                                                                                                                                                                                                           | Est (SE)     | z-Value | p-Value |
|--------------------------------------------------------------------------------------------------------------------------------------------------------------------------------------------------------------------------------------------------------|--------------|---------|---------|
| <b>Sleep (AIS)</b>                                                                                                                                                                                                                                     |              |         |         |
| Placebo                                                                                                                                                                                                                                                | 6.88 (0.46)  |         |         |
| Pregnenolone                                                                                                                                                                                                                                           | 6.29 (0.39)  |         |         |
| Difference                                                                                                                                                                                                                                             | 0.59 (0.92)  | -1.07   | 0.29    |
| <b>Resilience (CD-RISC)</b>                                                                                                                                                                                                                            |              |         |         |
| Placebo                                                                                                                                                                                                                                                | 73.13 (0.94) |         |         |
| Pregnenolone                                                                                                                                                                                                                                           | 73.21 (1.43) |         |         |
| Difference                                                                                                                                                                                                                                             | -0.08 (1.54) | 0.05    | 0.96    |
| <b>Working Memory (DS)</b>                                                                                                                                                                                                                             |              |         |         |
| Placebo                                                                                                                                                                                                                                                | 22.74 (0.34) |         |         |
| Pregnenolone                                                                                                                                                                                                                                           | 22.26 (0.38) |         |         |
| Difference                                                                                                                                                                                                                                             | 0.48 (0.85)  | -0.94   | 0.35    |
| <b>PTSD (DTS)</b>                                                                                                                                                                                                                                      |              |         |         |
| Placebo                                                                                                                                                                                                                                                | 15.04 (1.70) |         |         |
| Pregnenolone                                                                                                                                                                                                                                           | 17.71 (1.93) |         |         |
| Difference                                                                                                                                                                                                                                             | -2.67 (1.91) | 1.20    | 0.23    |
| <b>Executive Function (TOL)</b>                                                                                                                                                                                                                        |              |         |         |
| Placebo                                                                                                                                                                                                                                                | 19.58 (0.22) |         |         |
| Pregnenolone                                                                                                                                                                                                                                           | 19.04 (0.30) |         |         |
| Difference                                                                                                                                                                                                                                             | 0.54 (0.72)  | -1.45   | 0.15    |
| <b>Physical Functioning (RAND-36)</b>                                                                                                                                                                                                                  |              |         |         |
| Placebo                                                                                                                                                                                                                                                | 65.56 (1.45) |         |         |
| Pregnenolone                                                                                                                                                                                                                                           | 62.30 (2.50) |         |         |
| Difference                                                                                                                                                                                                                                             | 3.26 (1.99)  | -1.27   | 0.21    |
| Model estimates converted back to data scale. Abbreviations: AIS=Athens Insomnia Scale, CD-RISC=Connor Davidson Resilience Scale; DS=Digit Sequencing; DTS=Davidson Trauma Scale; TOL=Tower of London; RAND=Physical Functioning scale of the RAND-36. |              |         |         |

eTable 4. Neurosteroid Level Changes by Treatment Group

|                      | N  | Placebo        | N  | Pregnenolone   | p-Value |
|----------------------|----|----------------|----|----------------|---------|
| Pregnenolone (pg/mL) |    |                |    |                |         |
| Visit 3 (Baseline)   | 49 | 585.26 ± 48.85 | 45 | 585.26 ± 48.85 | 0.99    |

|                                                                                                 |    |                |    |                  |       |
|-------------------------------------------------------------------------------------------------|----|----------------|----|------------------|-------|
| Visit 4                                                                                         | 48 | 599.68 ± 54.70 | 45 | 1352.50 ± 107.57 | 0.000 |
| Visit 5                                                                                         | 47 | 684.04 ± 63.02 | 45 | 2443.89 ± 216.11 | 0.000 |
| Visit 6                                                                                         | 42 | 616.73 ± 51.20 | 41 | 2786.24 ± 285.94 | 0.000 |
| Allopregnanolone (pg/mL)                                                                        |    |                |    |                  |       |
| Visit 3 (Baseline)                                                                              | 49 | 62.22 ± 5.10   | 45 | 67.96 ± 9.83     | 0.95  |
| Visit 4                                                                                         | 48 | 59.73 ± 5.64   | 45 | 508.98 ± 55.31   | 0.000 |
| Visit 5                                                                                         | 47 | 71.22 ± 11.07  | 45 | 1036.50 ± 108.04 | 0.000 |
| Visit 6                                                                                         | 42 | 61.32 ± 6.00   | 41 | 1263.10 ± 136.90 | 0.000 |
| Pregnanolone (pg/mL)                                                                            |    |                |    |                  |       |
| Visit 3 (Baseline)                                                                              | 49 | 32.75 ± 2.02   | 45 | 34.98 ± 25.19    | 0.98  |
| Visit 4                                                                                         | 48 | 30.72 ± 2.58   | 45 | 249.13 ± 29.07   | 0.01  |
| Visit 5                                                                                         | 47 | 35.22 ± 3.68   | 45 | 679.00 ± 86.34   | 0.000 |
| Visit 6                                                                                         | 42 | 32.84 ± 2.28   | 41 | 883.87 ± 166.57  | 0.000 |
| Androsterone (pg/mL)                                                                            |    |                |    |                  |       |
| Visit 3 (Baseline)                                                                              | 49 | 177.60 ± 10.92 | 45 | 171.67 ± 14.06   | 0.70  |
| Visit 4                                                                                         | 48 | 171.89 ± 9.55  | 45 | 163.12 ± 12.73   | 0.58  |
| Visit 5                                                                                         | 47 | 177.42 ± 9.23  | 45 | 149.22 ± 11.0    | 0.08  |
| Visit 6                                                                                         | 42 | 186.26 ± 12.32 | 41 | 148.93 ± 11.07   | 0.02  |
| p-Value is calculated from the difference between placebo- and pregnenolone-treated conditions. |    |                |    |                  |       |
