# Supplementary material for: Effect of Pregnenolone vs Placebo on Self-reported Chronic Low Back Pain Among US Military Veterans: A Randomized Clinical Trial
Source: PubMed Central journal article supplement (PMC7052727; doi:10.1001/jamanetworkopen.2020.0287), 2020-03-02
Supplement: jamanetwopen-3-e200287-s003.pdf [file jamanetwopen-3-e200287-s003.pdf]

Naylor JC, Kilts JD, Shampine LJ, et al. Effect of pregnenolone vs placebo on self-reported chronic low back pain among US military veterans: a randomized clinical trial. JAMA Netw Open. 2020;3(3):e200287. doi:10.1001/jamanetworkopen.2020.0287

## **Data Sharing Statement**

### **Data**

**Data available:** No

### **Additional Information**

**Explanation for why data not available:** Data will be released according to VHA guidelines, upon appropriate request
